# Supplementary material
Source: PubMed Central journal article supplement (PMC4135476)
Supplement: NIHMS372572-supplement-Table_1.pdf [file NIHMS372572-supplement-Table_1.pdf]

**Supplementary Table 1: Effect of *KIR3DL1* alleles with *HLA-Bw4* on progression to AIDS**

| <b>Outcome</b>               | <b><i>3DL1</i><br/>Allele</b> | <b>N</b> | <b>RH</b> | <b>95% CI</b> | <b><i>p</i>-value</b> | <b><i>q</i>-value<sup>1</sup></b> |
|------------------------------|-------------------------------|----------|-----------|---------------|-----------------------|-----------------------------------|
| <b>CD4&lt;200</b><br>(N=503) | <i>*001</i>                   | 162      | 0.81      | 0.62-1.05     | 0.11                  | 0.006                             |
|                              | <i>*002</i>                   | 108      | 0.74      | 0.54-1.02     | 0.06                  | 0.004                             |
|                              | <i>*004</i>                   | 144      | 0.59      | 0.44-0.80     | 0.001                 | 0.0002                            |
|                              | <i>*005</i>                   | 131      | 0.76      | 0.56-1.01     | 0.06                  | 0.004                             |
|                              | <i>*007</i>                   | 49       | 0.89      | 0.56-1.41     | 0.61                  | 0.018                             |
|                              | <i>*008</i>                   | 36       | 0.71      | 0.43-1.17     | 0.18                  | 0.006                             |
|                              | <i>*009</i>                   | 46       | 0.56      | 0.33-0.97     | 0.04                  | 0.004                             |
|                              | <i>*015</i>                   | 164      | 0.81      | 0.60-1.09     | 0.17                  | 0.006                             |
| <b>AIDS1987</b><br>(N=527)   | <i>*001</i>                   | 171      | 0.66      | 0.49-0.90     | 0.01                  | 0.002                             |
|                              | <i>*002</i>                   | 111      | 0.66      | 0.46-0.94     | 0.02                  | 0.002                             |
|                              | <i>*004</i>                   | 147      | 0.50      | 0.35-0.72     | 0.0001                | 0.00005                           |
|                              | <i>*005</i>                   | 141      | 0.80      | 0.58-1.09     | 0.16                  | 0.006                             |
|                              | <i>*007</i>                   | 50       | 0.65      | 0.37-1.15     | 0.14                  | 0.006                             |
|                              | <i>*008</i>                   | 38       | 0.76      | 0.42-1.36     | 0.35                  | 0.011                             |
|                              | <i>*009</i>                   | 47       | 1.07      | 0.66-1.73     | 0.78                  | 0.022                             |
|                              | <i>*015</i>                   | 172      | 0.74      | 0.52-1.06     | 0.10                  | 0.006                             |

*p*-values are based on comparisons of individual *3DL1* alleles in the presence of *Bw4* vs. the *Bw6/Bw6* control group (N = 339-355).

<sup>1</sup>The *q*-value is a measure of the expected proportion of false positives.

N = number of individuals; RH = relative hazard; 95%CI = 95% confidence interval
