# Supplementary material
Source: PubMed Central journal article supplement (PMC4135476)
Supplement: NIHMS372572-supplement-Table_2.pdf [file NIHMS372572-supplement-Table_2.pdf]

**Supplementary Table 2: Direct Comparison of Genotypes**

| <b>Survival Analysis</b>     |                               |                  |           |               |                |
|------------------------------|-------------------------------|------------------|-----------|---------------|----------------|
| <b>Outcome</b>               | <b>Genotype</b>               | <b>N</b>         | <b>RH</b> | <b>95% CI</b> | <b>p-value</b> |
| CD4<200                      | <i>3DL1 *h/*y+Bw4</i> vs      | 306              | 0.90      | 0.68-1.19     | 0.46           |
|                              | <i>3DL1 *l/*x +Bw4</i>        | 182              |           |               |                |
|                              | <i>3DL1 *h/*y+Bw4-80I</i> vs  | 186              | 0.66      | 0.45-0.98     | 0.04           |
|                              | <i>3DL1 *l/*x +Bw4-80I</i>    | 87               |           |               |                |
|                              | <i>3DL1 *l/*x +Bw4-80T</i> vs | 113              | 0.83      | 0.58-1.19     | 0.32           |
|                              | <i>3DL1 *h/*y+Bw4-80T</i>     | 148              |           |               |                |
|                              | <i>3DL1 *h/*y+B*57</i> vs     | 43               | 0.61      | 0.23-1.62     | 0.32           |
|                              | <i>3DL1 *l/*x+B*57</i>        | 27               |           |               |                |
|                              | <i>3DL1 *l/*x +B*27</i> vs    | 20               | 0.59      | 0.25-1.39     | 0.23           |
|                              | <i>3DL1 *h/*y+B*27</i>        | 30               |           |               |                |
| AIDS1987                     | <i>3DL1 *h/*y+Bw4</i> vs      | 317              | 0.80      | 0.58-1.10     | 0.16           |
|                              | <i>3DL1 *l/*x +Bw4</i>        | 194              |           |               |                |
|                              | <i>3DL1 *h/*y+Bw4-80I</i> vs  | 194              | 0.63      | 0.39-1.02     | 0.06           |
|                              | <i>3DL1 *l/*x +Bw4-80I</i>    | 94               |           |               |                |
|                              | <i>3DL1 *l/*x +Bw4-80T</i> vs | 119              | 1.00      | 0.68-1.48     | 0.99           |
|                              | <i>3DL1 *h/*y+Bw4-80T</i>     | 152              |           |               |                |
|                              | <i>3DL1 *h/*y+B*57</i> vs     | 44               | 0.40      | 0.13-1.27     | 0.12           |
|                              | <i>3DL1 *l/*x+B*57</i>        | 29               |           |               |                |
|                              | <i>3DL1 *l/*x +B*27</i> vs    | 21               | 0.81      | 0.29-2.28     | 0.69           |
|                              | <i>3DL1 *h/*y+B*27</i>        | 30               |           |               |                |
| <b>Viral Load Analysis</b>   |                               |                  |           |               |                |
| <b>Genotype</b>              | <b>mVL</b>                    | <b>mVL</b>       | <b>OR</b> | <b>95% CI</b> | <b>p-value</b> |
|                              | <b>&lt;2000</b>               | <b>&gt;10000</b> |           |               |                |
| <i>3DL1 *h/*y+Bw4-80I</i> vs | 63 (71.6)                     | 69 (56.6)        | 0.58      | 0.31-1.08     | 0.08           |
| <i>3DL1 *l/*x +Bw4-80I</i>   | 25 (28.4)                     | 53 (43.4)        |           |               |                |
| <i>3DL1 *h/*y+B*57</i> vs    | 39 (79.6)                     | 17 (50)          | 0.23      | 0.07-0.69     | 0.009          |
| <i>3DL1 *l/*x+B*57</i>       | 10 (20.4)                     | 17 (50)          |           |               |                |
| <i>3DL1 *l/*x+B*27</i> vs    | 10 (55.6)                     | 11 (40.7)        | 0.57      | 0.16-2.01     | 0.38           |
| <i>3DL1 *h/*y+B*27</i>       | 8 (44.4)                      | 16 (59.3)        |           |               |                |

N = number of individuals; RH = relative hazard; 95%CI = 95% confidence interval; mVL = mean viral load; OR = odds ratio.
