# Supplementary material
Source: PubMed Central journal article supplement (PMC4135476)
Supplement: NIHMS372572-supplement-Table_3.pdf [file NIHMS372572-supplement-Table_3.pdf]

**Supplementary Table 3: Synergistic effect of *HLA-B\*57* and *-B\*27* with *KIR3DL1\*h* and *\*l* on AIDS progression**

| <b>Outcome</b>        | <b>Genotype</b>       | <b>N</b>              | <b>RH</b> | <b>95% CI</b> | <b><i>p</i>-value</b> |       |
|-----------------------|-----------------------|-----------------------|-----------|---------------|-----------------------|-------|
| <b>CD4&lt;200</b>     | <i>Bw6/Bw6</i>        | 327                   |           |               |                       |       |
|                       | <i>3DL1*h/*y+B*57</i> | 43                    | 0.30      | 0.15-0.59     | 0.0005                |       |
|                       | <i>3DL1*l/*x+B*57</i> | 27                    | 0.50      | 0.25-1.02     | 0.06                  |       |
|                       | <i>3DL1*h/*y+B*27</i> | 30                    | 0.82      | 0.48-1.39     | 0.46                  |       |
|                       | <i>3DL1*l/*x+B*27</i> | 20                    | 0.47      | 0.23-0.96     | 0.04                  |       |
|                       | <b>AIDS1987</b>       | <i>Bw6/Bw6</i>        | 340       |               |                       |       |
|                       |                       | <i>3DL1*h/*y+B*57</i> | 44        | 0.26          | 0.11-0.64             | 0.003 |
|                       |                       | <i>3DL1*l/*x+B*57</i> | 29        | 0.60          | 0.28-1.29             | 0.19  |
| <i>3DL1*h/*y+B*27</i> |                       | 30                    | 0.70      | 0.39-1.27     | 0.25                  |       |
| <i>3DL1*l/*x+B*27</i> |                       | 21                    | 0.44      | 0.20-1.01     | 0.05                  |       |

p-values are based on comparisons between the genotypic variable listed and the *Bw6/Bw6* control group.

N = number of individuals; RH= relative hazard; 95% CI = 95% confidence interval.
