# Supplementary material
Source: PubMed Central journal article supplement (PMC4135476)
Supplement: NIHMS372572-supplement-Table_4.pdf [file NIHMS372572-supplement-Table_4.pdf]

**Supplementary Table 4: Effect of combinations of *KIR3DL1* and *HLA-B* on mean viral load set point (excluding samples that overlap with the progression analysis)**

|                          | Without co-variables <sup>1</sup> |           |            |           |                    |        |              |              |        |            |       |              |                |            |                    |
|--------------------------|-----------------------------------|-----------|------------|-----------|--------------------|--------|--------------|--------------|--------|------------|-------|--------------|----------------|------------|--------------------|
|                          | mVL <2000                         |           | mVL >10000 |           | OR                 | 95% CI | p-value      | mVL <2000    |        | mVL >10000 |       | mVL <2000    | mVL 2000-10000 | mVL >10000 | p for trend        |
|                          | N (%)                             | N (%)     | N (%)      | N (%)     |                    |        |              | OR           | 95% CI | p-value    | N (%) |              |                |            |                    |
| <i>Bw6/Bw6</i>           | 37<br>(32.5)                      | 81 (67.5) | 1.0        |           |                    |        | 37<br>(32.5) | 77<br>(67.5) | 1.00   |            |       | 37<br>(30.1) | 9 (7.3)        | 77 (62.6)  |                    |
| <i>3DL1*h/*y+Bw4-80I</i> | 55<br>(65.5)                      | 29 (34.5) | 0.2        | 0.14-0.52 | 9x10 <sup>-5</sup> |        | 17<br>(63.0) | 10<br>(37.0) | 0.25   | 0.10-0.67  | 0.01  | 55<br>(61.1) | 6 (6.7)        | 29 (32.2)  | 6x10 <sup>-5</sup> |
| <i>3DL1*I/*x+Bw4-80I</i> | 22<br>(55.0)                      | 18 (45.0) | 0.4        | 0.18-0.89 | 0.02               |        | 9 (50.0)     | 9 (50.0)     | 0.52   | 0.17-1.56  | 0.24  | 22<br>(51.2) | 3 (7.0)        | 18 (41.8)  | 0.02               |
| <i>3DL1*004+Bw4</i>      | 36<br>(52.2)                      | 33 (47.8) | 1          | 0.21-0.78 | 0.01               |        | 23<br>(60.5) | 15<br>(39.5) | 0.27   | 0.12-0.61  | 0.001 | 36<br>(50.0) | 3 (4.2)        | 33 (45.8)  | 7x10 <sup>-3</sup> |
| <i>3DL1*h/*y+B*57</i>    | 36<br>(78.3)                      | 10 (21.7) | 0.1        | 0.06-0.36 | 2x10 <sup>-5</sup> |        |              |              |        |            |       | 36<br>(76.6) | 1 (2.1)        | 10 (21.3)  | 1x10 <sup>-5</sup> |
| <i>3DL1*I/*x+B*57</i>    | 8 (53.3)                          | 7 (46.7)  | 0.5        | 0.16-1.66 | 0.26               |        |              |              |        |            |       | 8 (50.0)     | 1 (6.3)        | 7 (43.7)   | 0.22               |
| <i>3DL1*h/*y+B*27</i>    | 7 (70.0)                          | 3 (30.0)  | 0.1        | 0.04-0.78 | 0.02               |        |              |              |        |            |       | 7 (50.0)     | 4 (28.6)       | 3 (21.4)   | 0.01               |
| <i>3DL1*I/*x+B*27</i>    | 7 (77.8)                          | 2 (22.2)  | 0.1        | 0.03-0.75 | 0.02               |        |              |              |        |            |       | 7 (70.0)     | 1 (10.0)       | 2 (20.0)   | 0.02               |

<sup>1</sup>For the *Bw4-80I* groups, all individuals with *KIR3DL1\*004*, *B\*57*, and *B\*27* were removed from the analysis. For the *KIR3DL1\*004* group, all individuals with *B\*57*, *B\*27*, and *3DL1\*h/\*y+Bw4-80I* were removed from the analysis.

p-values are based on comparisons between the genotypic variable listed and the *Bw6/Bw6* control group.

N = number of individuals; mVL = mean viral load; OR= odds ratio; 95% CI = 95% confidence interval
