# Supplementary material
Source: PubMed Central journal article supplement (PMC4135476)
Supplement: NIHMS372572-supplement-Table_5.pdf [file NIHMS372572-supplement-Table_5.pdf]

**Supplementary Table 5: Synergistic effects of *KIR3DL1* and *HLA-B* on HIV Disease Progression and mean viral load**

| Outcome           | Genotype                 | N   | Survival Analysis |             |         | Genotype                 | mVL<2000  |           | mVL>10,000 |            | p-value             |
|-------------------|--------------------------|-----|-------------------|-------------|---------|--------------------------|-----------|-----------|------------|------------|---------------------|
|                   |                          |     | RH                | 95% CI      | p-value |                          | N         | N         | OR         | 95% CI     |                     |
| <b>CD4&lt;200</b> | <i>Bw6/Bw6</i>           | 343 | 1.00              |             |         | <i>Bw6/Bw6</i> (N = 248) |           |           |            |            |                     |
|                   | <i>Bw4 (no 3DL1*004)</i> | 488 | 0.75              | 0.62 - 0.92 | 0.01    |                          |           |           |            |            |                     |
|                   | <i>3DL1 004 + Bw4</i>    | 144 | 0.59              | 0.44 - 0.80 | 0.001   | <i>3DL1*I/*x+B*57</i>    | 10 (37.0) | 17 (63.0) | 0.38       | 0.15-0.95  | 0.04                |
|                   | <i>3DL1*I/*x+Bw4-80I</i> | 87  | 0.89              | 0.64-1.25   | 0.51    | <i>3DL1*h/*y+B*57</i>    | 39 (69.6) | 17 (30.7) | 0.10       | 0.05-0.19  | 7x10 <sup>-11</sup> |
|                   | <i>3DL1*h/*y+Bw4-80I</i> | 186 | 0.61              | 0.45 - 0.81 | 0.001   |                          |           |           |            |            |                     |
|                   | <i>3DL1*I/*x+B*57</i>    | 27  | 0.50              | 0.25-1.02   | 0.06    | <i>3DL1*h/*y+B*27</i>    | 8 (33.3)  | 16 (66.7) | 0.37       | 0.14-1.00  | 0.05                |
|                   | <i>3DL1*h/*y+B*57</i>    | 43  | 0.30              | 0.15 - 0.59 | 0.0005  | <i>3DL1*I/*x+B*27</i>    | 10 (47.6) | 11 (52.4) | 0.22       | 0.08- 0.59 | 0.003               |
|                   | <i>3DL1*h/*y+B*27</i>    | 30  | 0.82              | 0.48-1.39   | 0.46    |                          |           |           |            |            |                     |
|                   | <i>3DL1*I/*x+B*27</i>    | 20  | 0.47              | 0.23 - 0.96 | 0.04    | <i>3DL1*I/*x+Bw4-80I</i> | 25 (32.1) | 53 (67.9) | 0.43       | 0.23-0.79  | 0.007               |
|                   | <i>3DS1+Bw4-80I</i>      | 112 | 0.54              | 0.38 - 0.76 | 0.0004  | <i>3DL1*h/*y+Bw4-80I</i> | 63 (47.7) | 69 (52.3) | 0.24       | 0.14-0.40  | 6x10 <sup>-8</sup>  |
| <b>AIDS1987</b>   | <i>Bw6/Bw6</i>           | 359 | 1.00              |             |         |                          |           |           |            |            |                     |
|                   | <i>Bw4 (no 3DL1*004)</i> | 511 | 0.70              | 0.56 - 0.88 | 0.002   |                          |           |           |            |            |                     |
|                   | <i>3DL1 004 + Bw4</i>    | 147 | 0.50              | 0.35 - 0.72 | 0.0001  |                          |           |           |            |            |                     |
|                   | <i>3DL1*I/*x+Bw4-80I</i> | 94  | 0.79              | 0.53-1.19   | 0.26    |                          |           |           |            |            |                     |
|                   | <i>3DL1*h/*y+Bw4-80I</i> | 194 | 0.56              | 0.40 - 0.80 | 0.001   |                          |           |           |            |            |                     |
|                   | <i>3DL1*I/*x+B*57</i>    | 29  | 0.60              | 0.28-1.29   | 0.19    |                          |           |           |            |            |                     |
|                   | <i>3DL1*h/*y+B*57</i>    | 44  | 0.26              | 0.11 - 0.64 | 0.003   |                          |           |           |            |            |                     |
|                   | <i>3DL1*h/*y+B*27</i>    | 30  | 0.70              | 0.39-1.27   | 0.25    |                          |           |           |            |            |                     |
|                   | <i>3DL1*I/*x+B*27</i>    | 21  | 0.44              | 0.20 - 1.01 | 0.05    |                          |           |           |            |            |                     |
|                   | <i>3DS1+Bw4-80I</i>      | 114 | 0.52              | 0.36 - 0.75 | 0.0005  |                          |           |           |            |            |                     |

p-values are based on comparisons between the genotypic variable listed and the *Bw6/Bw6* control group. N = number of individuals; RH = relative hazard; 95%CI = 95% confidence interval.
