# Supplementary material
Source: PubMed Central journal article supplement (PMC4135476)
Supplement: NIHMS372572-supplement-Table_6.pdf [file NIHMS372572-supplement-Table_6.pdf]

**Supplementary Table 6: *KIR3DL1* Primers and probes**

| <b>PCR PRIMERS</b> | <b>EXON</b> | <b>SEQUENCE</b>        |
|--------------------|-------------|------------------------|
| K3DL1-102          | 3           | TCTTGGTCCAGAGGGCCGGTC  |
| K3DL1-379          | 3           | TGTGACCATGATCACCA      |
| K3DLS1-1050        | 7, 8, 9     | CTCTTCTTCCAGGWAACCCCA  |
| K3DLS1-1403        | 7, 8, 9     | CTGTTGTCTCCCTAGAAGACG  |
| K3DLS1-400         | 4           | ACAAC TTCTCTTTCTAGGAAA |
| K3DLS1-674         | 4           | TGTGACCACGATGTCCAGGGGA |
| K3DLS1-739         | 5           | TCTCAGCCCAGCCGGGCCCCAA |
| K3DLS1-957         | 5           | AAGCAGTGGGTCACTCGGGTC  |

| <b>PROBES</b> | <b>TM</b> | <b>SEQUENCE</b>      |
|---------------|-----------|----------------------|
| K300          | 61        | GGACAAGCCCTTCCTGTCT  |
| K301          | 61        | GGACAAACCCTTCCTGTCT  |
| K302          | 61        | GGACAAGCCCTCCCTGTCT  |
| K303          | 62        | TGTCACTATCGTCATAGGT  |
| K304          | 61        | TGTCACTATCATCATAGGT  |
| K306          | 61        | CATGCTATACAGAGAAGAC  |
| K307          | 61        | ATCCACATTTCCCATCTTCC |
| K308          | 61        | ATCCACGTTCCCATCTTCC  |
| K309          | 61        | ATGGCAGAATATTCAGGA   |
| K310          | 61        | ATGGCAGATTATTCAGGA   |
| K311          | 62        | ATTCCAGGAGAGCTTCAAC  |
| K312          | 61        | ATTCCAGGAGGGCTTCAAC  |
| K401          | 61        | CTTCCCTCCTGGGCCACCC  |
| K403          | 61        | CACCCAAGGTCCCCTGTGA  |
| K405          | 61        | GTGAGATCAGGGGAGAGAG  |
| K407          | 61        | GAGTCACCCTGCAATGTTG  |
| K408          | 62        | GAGTCATCTTGCAATGTTG  |
| K410          | 61        | ATGTTTGAACACTTCCTTC  |
| K412          | 61        | GGATCCCTAAGGACCCCTC  |
| K413          | 61        | GGACTCTAATCGACCCCTC  |
| K415          | 61        | GACCCCTCAAGCCTCGTTG  |
| K416          | 61        | GACCCCTCGCGCCTCATTG  |
| K417          | 63        | GACCCCTCACACCTCGTTG  |
| K419          | 61        | GACAGACCCATGATGGGGT  |
| K421          | 61        | GGCCAATTTCTCCATCGGT  |
| K422          | 61        | CCAATTTCTCCATTGGTCC  |
| K424          | 62        | CCATGATGCTTGACCTTGC  |
| K425          | 59        | CCATGATGCGTGCCCTTGC  |
| K427          | 61        | CTGTTCCCTCACTCCCCCTA |
| K428          | 61        | CTGTTACTAACACCCCTA   |
| K429          | 59        | CTGTTACTCACACCTCCTA  |
| K502          | 61        | GAGAGAGCGCGACCTTGTC  |
| K503          | 61        | ACCTTGTCCTGTAGCTCCC  |

|      |    |                      |
|------|----|----------------------|
| K504 | 61 | ACCTTGTCCCTGCAGCTCCC |
| K506 | 61 | GGGAGCGGGGAGCCCATGA  |
| K508 | 61 | ACGGAGGGACCAACAGATG  |
| K509 | 61 | GCTTCGGCTCTTTCCGTCA  |
| K510 | 62 | GCTTTGGCTCTTTCCGTCA  |
| K511 | 63 | GCTTCGGCTCTTTCTGTCA  |
| K513 | 58 | CTCTCCCTACGAGTTGTCA  |
| K701 | 61 | CCTGCACATTCTGATTGGG  |
| K702 | 61 | CCTGCACGTTCTGATTGGG  |
| K703 | 61 | CCTGCATGTTCTCATTTGGG |
| K704 | 59 | CATCTCTGGTGCTCCAACA  |
| K705 | 61 | CATCTCTGGTACTCCAACA  |
| K800 | 62 | GGACCAAGAGCCTGCAGGG  |
| K801 | 63 | GGACCAAGAGTCTGCAGGG  |
| K802 | 63 | GGACCAGGAGCCTGCAGGG  |
| K804 | 61 | CCAACAGCGAGGATTCTGA  |
| K901 | 62 | ACAAGACCCTGAGGAGGTG  |
| K902 | 61 | ACAAGACCCTCAGGAGGTG  |
| K903 | 62 | ACATACGCACAGTTGGATC  |
| K904 | 63 | ACATATGCACAGTTGGATC  |
| K906 | 63 | GCACAGTTGGATCCCTGCG  |
| K907 | 62 | GCCCATGAGCACCACAGTC  |
| K908 | 61 | GCCCATGAGTACCACAGTC  |
